# Supplementary material for: Design, fabrication and the relative catalytic properties of metal–organic framework complexes based on tetra(4-carboxyphenyl)porphyrin and cerium ions
Source: Royal Society of Chemistry journal article supplement (doi:10.1039/c3ce42600a), 2014-01-01
Supplement: c3ce42600a1.pdf [file c3ce42600a1.pdf]

## Supporting Information

### **Design, Fabrication and the Relative Catalytic Properties of Metal-organic Framework Complexes Based on Tetra(4-carboxyphenyl)porphyrin and Cerium Ions**

**Fei Yang, Lu Jing, Lisha Ji, and Xiaomei Zhang<sup>\*,†</sup>**

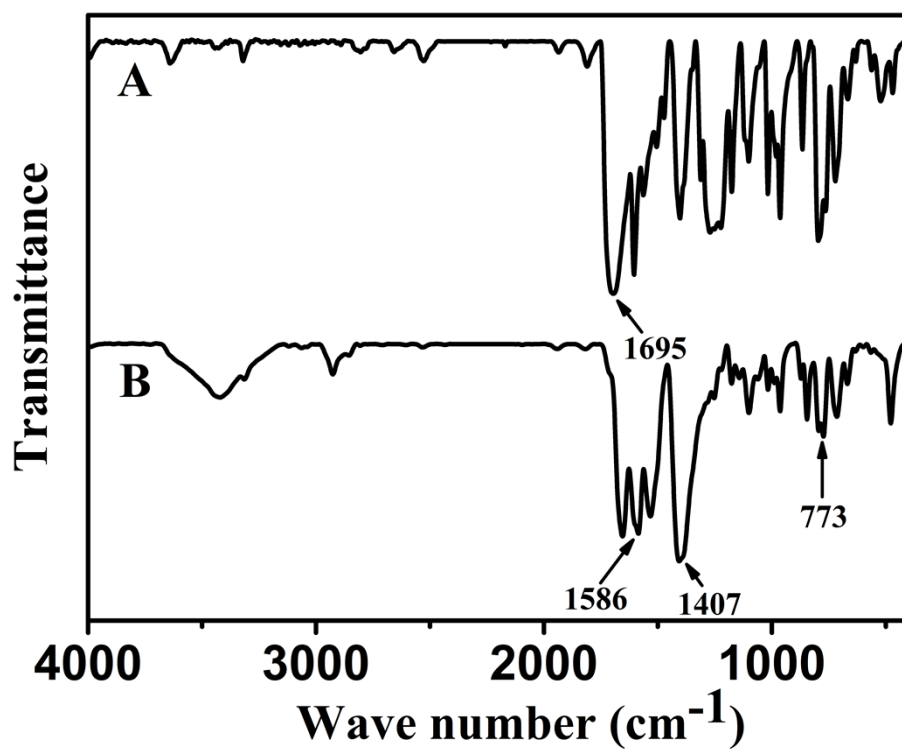

**Figure S1.** IR spectra of H<sub>2</sub>TCPP (**3**) (A) and nanostructures fabricated from H<sub>2</sub>TCPP/Ce(**1**) (B) in the region of 400-4000 cm<sup>-1</sup> with 2 cm<sup>-1</sup> resolution.

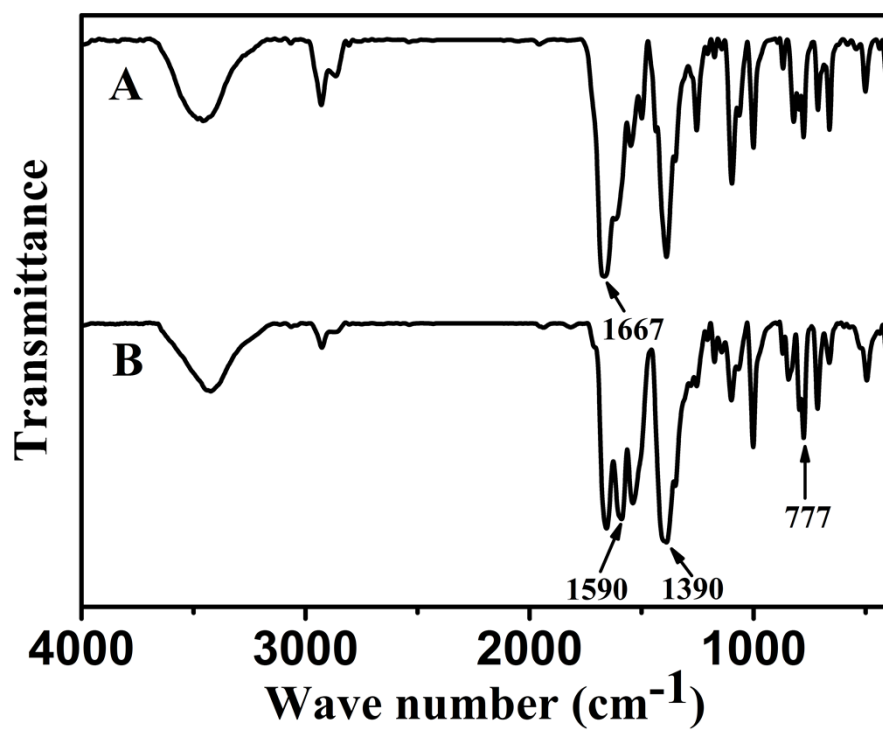

**Figure S2.** IR spectra of CoTCPP (**4**) (A) and nanostructures fabricated from CoTCPP/Ce (**2**) (B) in the region of 400-4000  $\text{cm}^{-1}$  with 2  $\text{cm}^{-1}$  resolution.

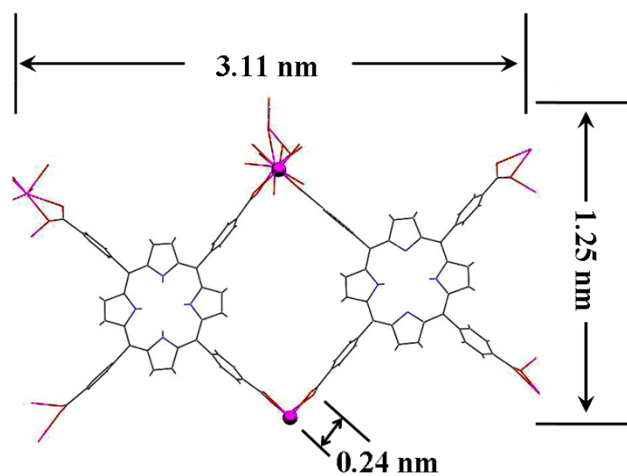

Figure S3. Schematic representation of a Ce-connected supramolecular dimeric structure  $H_2TCPP/Ce$  (**1**).
